# Supplementary material for: Placental Passage of Protopine in an Ex Vivo Human Perfusion System
Source: PubMed Central journal article supplement — Planta Med. 2022 Aug 22;89(2):194–207. doi: 10.1055/a-1829-9546 (PMC9868778; doi:10.1055/a-1829-9546), 2022-08-22
Supplement: 10-1055-a-1829-9546-sup_pmg0167.pdf [file 10-1055-a-1829-9546-sup_pmg0167.pdf]

## Supplementary Material

### Placental passage of protopine in an *ex vivo* human perfusion system

Deborah Spiess<sup>1,2\*</sup>, Vanessa Fabienne Abegg<sup>2\*</sup>, Antoine Chauveau<sup>2</sup>, Andrea Treyer<sup>2</sup>, Michael Reinehr<sup>3</sup>, Mouhssin Oufir<sup>2§</sup>, Elisa Duong<sup>1,2</sup>, Olivier Potterat<sup>2</sup>, Matthias Hamburger<sup>2</sup>, Ana Paula Simões-Wüst<sup>1</sup>

#### Affiliations

<sup>1</sup>Department of Obstetrics, University Hospital Zurich, University of Zurich, Zurich, Switzerland

<sup>2</sup>Division of Pharmaceutical Biology, Department of Pharmaceutical Sciences, University of Basel, Basel, Switzerland

<sup>3</sup>Department of Pathology and Molecular Pathology, University Hospital Zurich, Zurich, Switzerland

§Present address: Oncodesign SA, Villebon-sur-Yvette, France

\*These authors contributed equally to the work

#### Correspondence

***Prof Dr. Matthias Hamburger***

Division of Pharmaceutical Biology  
Department of Pharmaceutical Sciences  
University of Basel  
Klingelbergstrasse 50  
4056 Basel  
Switzerland  
Phone: +41 61 207 14 25  
[matthias.hamburger@unibas.ch](mailto:matthias.hamburger@unibas.ch)

***PD Dr. Ana Paula Simões-Wüst***

University Hospital of Zurich  
Department of Obstetrics  
Schmelzbergstrasse 12/PF 125, Path G51a  
8091 Zurich  
Switzerland  
Phone: +41 44 255 51 31  
Fax: +41 44 255 44 30  
[anapaula.simoes-wuest@usz.ch](mailto:anapaula.simoes-wuest@usz.ch)

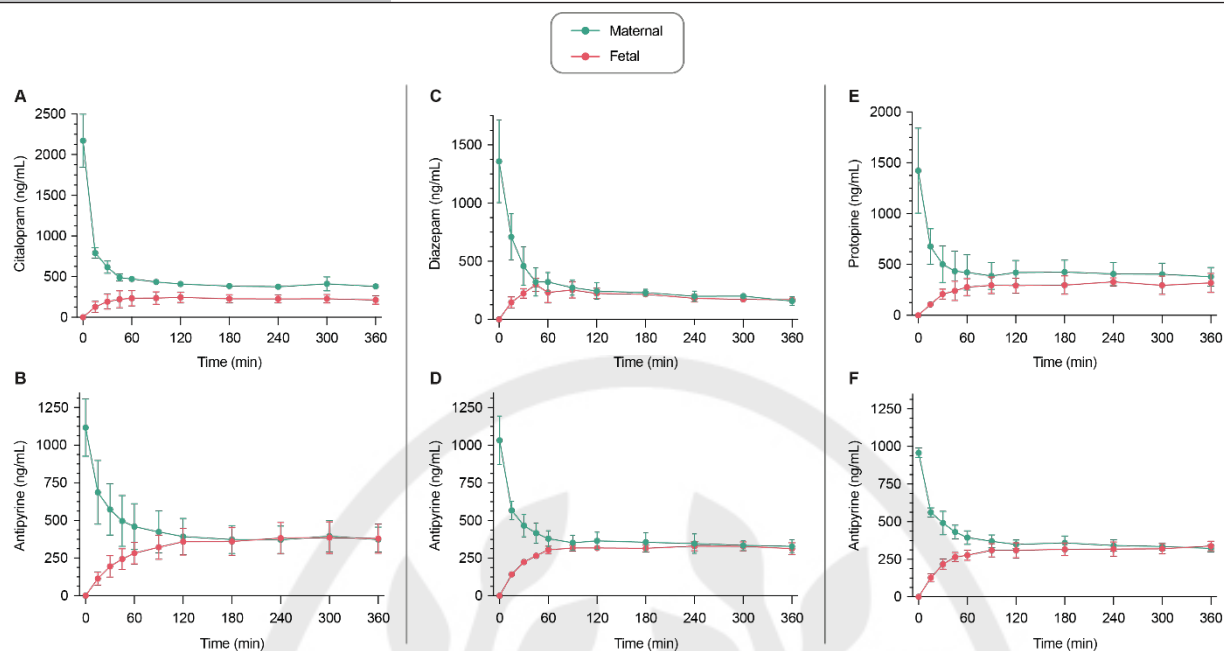

**Fig. 1S.** *Ex vivo* human placental perfusion profiles of citalopram (A), diazepam (C), and protopine (E) with corresponding connectivity control (antipyrine) transfers (B, D and F, respectively). Concentrations are expressed as absolute concentrations in ng/mL (● maternal and ● fetal). All values are expressed as mean  $\pm$  standard deviation (SD) of 3 independent experiments.

**Table 1S.** Recovery of study compounds after 360 min of *ex vivo* human placental perfusion in relative amounts (% found)  $\pm$  standard deviation (SD) in different compartments.

|            | Adherence<br>(% lost) | M perfusate<br>(% found) | F perfusate<br>(% found) | Sampling<br>(% found) | Final recovery*<br>(% found) |
|------------|-----------------------|--------------------------|--------------------------|-----------------------|------------------------------|
| Antipyrine | 8.2 $\pm$ 4.3         | 22.0 $\pm$ 4.2           | 19.8 $\pm$ 3.1           | 21.2 $\pm$ 1.5        | 71.2 $\pm$ 7.2               |
| Protopine  | 19.5 $\pm$ 8.3        | 23.1 $\pm$ 4.8           | 14.0 $\pm$ 3.7           | 14.8 $\pm$ 1.5        | 71.4 $\pm$ 8.6               |
| Citalopram | 42.7 $\pm$ 11.3       | 11.4 $\pm$ 1.5           | 6.4 $\pm$ 1.5            | 11.4 $\pm$ 2.9        | 71.9 $\pm$ 5.2               |
| Diazepam   | 44.4 $\pm$ 5.6        | 7.9 $\pm$ 2.2            | 7.9 $\pm$ 2.3            | 13.4 $\pm$ 1.3        | 73.6 $\pm$ 4.8               |

M = maternal; F = fetal; \* sum of compound present in fetal and maternal perfusates at the end of a perfusion, the amount sampled during the perfusion (sampling from fetal and maternal perfusates), and adherence of compounds by binding to the perfusion model, determined by the system adherence test (empty perfusion).

**Table 2S.** Fraction unbound ( $f_{u, \text{hom}}$ ) of study compounds to the placental homogenate determined by rapid equilibrium membrane dialysis. The homogenates (from 3 different donors) were each spiked with the compounds and added to the donor chamber. The receiver chamber consisted of blank buffer (PBS). Samples were collected after equilibration (240 min at 37°C, 600 rpm) and were analyzed by U(H)PLC-MS/MS. A dilution factor of 4 was applied to calculate the undiluted fraction unbound.

|            | Fraction unbound<br>( $f_{u, \text{hom}}$ ) |
|------------|---------------------------------------------|
| Antipyrine | 1.00                                        |
| Protopine  | 0.48 $\pm$ 0.04                             |
| Citalopram | 0.21 $\pm$ 0.01                             |
| Diazepam   | 0.09 $\pm$ 0.007                            |

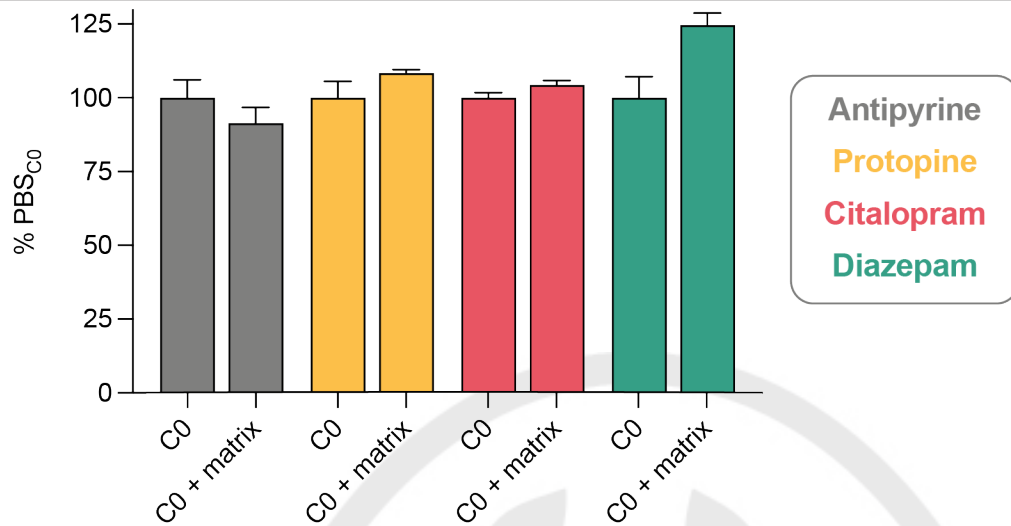

**Fig. 2S.** Matrix effects by the homogenate on the substances antipyrine, protopine, citalopram, and diazepam. The compounds were spiked into PBS and then diluted with either an equal volume of PBS (C0) or an equal volume of tissue homogenate (C0 + matrix). The samples were processed for LC-MS analysis within 1-3 min after the dilution to avoid interference of any stability issues. All values are expressed as mean  $\pm$  standard deviation (SD) of 3 to 4 independent experiments.

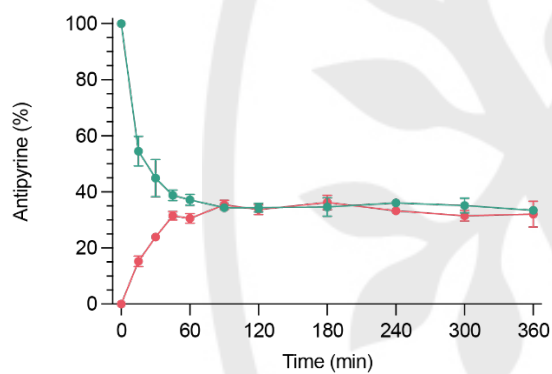

**Fig. 3S.** Perfusion profile of antipyrine from control perfusions. Concentrations are expressed as a percentage (%) of initial analyzed concentration in the maternal sample ( $\bullet$  maternal and  $\bullet$  fetal). All values are expressed as mean  $\pm$  standard deviation (SD) of at least 3 independent experiments (except timepoint 360 min in which only 2 values are included).

**Table 3S.** Characteristics of placentae used, and data from individual perfusions with all study compounds (antipyrine, n=3; protopine, n=4; citalopram, n=4; and diazepam, n=5).

|                                     | Antipyrine |       |      | Protopine |       |       |       | Citalopram |       |       |       | Diazepam |      |       |      |       |
|-------------------------------------|------------|-------|------|-----------|-------|-------|-------|------------|-------|-------|-------|----------|------|-------|------|-------|
| Experiment number                   | 1          | 2     | 3    | 1         | 1     | 1     | 1     | 1          | 2     | 3     | 4     | 1        | 2    | 3     | 4    | 5     |
| Placenta weight (g)                 | 690        | 680   | 580  | 716       | 555   | 555   | 555   | 660        | 720   | 720   | 480   | 520      | 500  | 580   | 480  | 690   |
| Cotyledon weight (g)                | 30.95      | 23.26 | 6.15 | 17.13     | 22.27 | 22.27 | 22.27 | 24.56      | 45.93 | 12.50 | 12.95 | 12.92    | 7.32 | 18.17 | 15.8 | 17.18 |
| Volume loss* (M, mL)                | -4         | 6     | 11   | -7        | 4     | 4     | 4     | 1          | -5    | -11   | 14    | -6       | -2   | 0     | 0    | -1    |
| Volume loss* (F, mL)                | 8          | 10    | 4    | 6         | 3     | 3     | 3     | 5          | 8     | 4     | 9     | 4        | 4    | 0     | 11   | 3     |
| Preparation time <sup>°</sup> (min) | 42         | 14    | 29   | 17        | 22    | 22    | 22    | 25         | 18    | 13    | 30    | 15       | 15   | 15    | 15   | 18    |
| Cannulation time <sup>§</sup> (min) | 16         | 15    | 30   | 30        | 13    | 13    | 13    | 35         | 40    | 19    | 19    | 27       | 21   | 18    | 22   | 23    |
| Open pre-phase (min)                | 20         | 20    | 20   | 20        | 20    | 20    | 20    | 22         | 20    | 20    | 20    | 21       | 20   | 20    | 22   | 13    |
| Close pre-phase (min)               | 20         | 20    | 20   | 23.5      | 21    | 21    | 21    | 22.5       | 20    | 20    | 20    | 25       | 24   | 26    | 24   | 43    |
| Perfusion time (min)                | 300        | 360   | 360  | 240       | 360   | 360   | 360   | 360        | 360   | 300   | 360   | 360      | 360  | 360   | 360  | 360   |

\* Total volume loss at the end of the perfusion time; M = maternal; F = fetal; <sup>°</sup> time from birth to begin of cannulation; <sup>§</sup> time from cannulation to begin of open pre-phase.

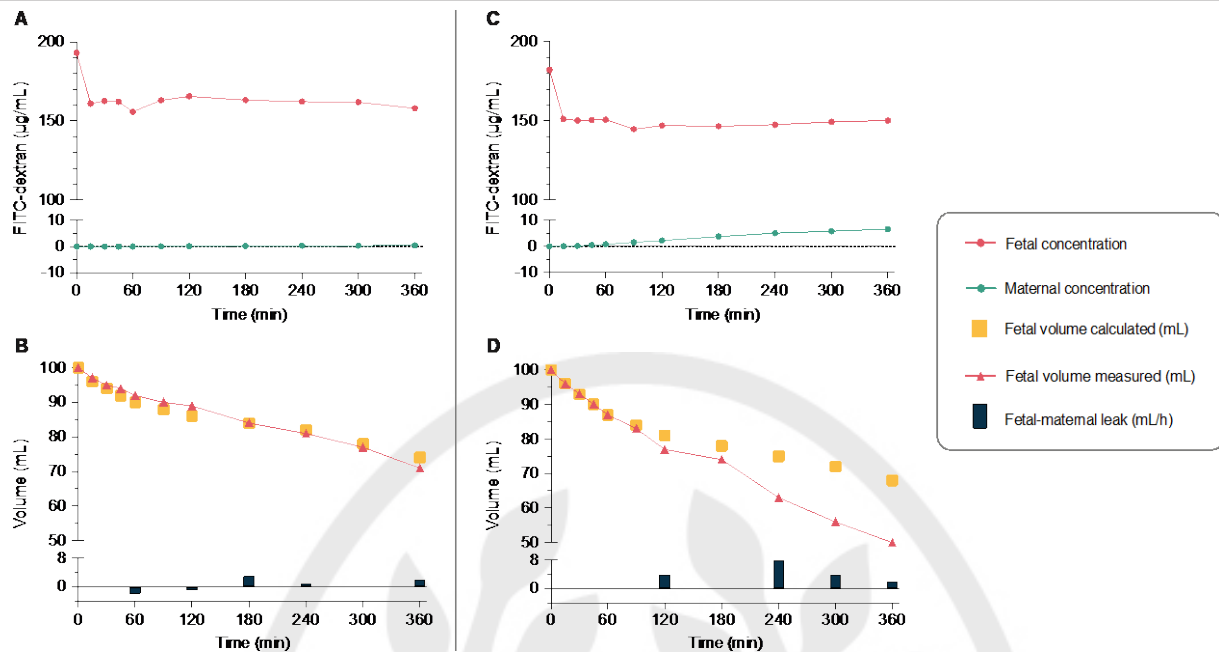

**Fig. 4S.** Establishment and validation of the human *ex vivo* placental perfusion model. Assessment of the suitability of fluorescein isothiocyanate (FITC)-dextran (40 kDa) as a fetal capillary integrity marker when added to the fetal circuit at a concentration of 200 µg/mL. **(A)** A representative perfusion profile without a transfer of fluorescence (FITC-dextran) from the fetal to the maternal side occurs when the following two conditions were met: **(B)** the measured fetal volume corresponded to the calculated volume and a fetal-maternal (FM) leak of 4 mL/h was not exceeded. **(C)** A representative profile with a FITC-dextran transfer into the maternal circuit, if these conditions were violated: **(D)** the course of measured fetal volume in the corresponding perfusion deviated from the calculated volume, indicative of FM leaks (e.g. 8 mL/h at 240 min). A tracking of fetal and maternal volumes was therefore considered an adequate indicator for FM leaks, and no FITC-dextran was added in the subsequent placental perfusions.

**Table 4S.** U(H)PLC gradients, flow rate, and internal standards for the analysis of antipyrine, protopine, verapamil, diazepam, and citalopram. The mobile phase consisted of A (water with 5% MeCN and 0.1% formic acid) and B (MeCN with 0.1% formic acid). In the case of diazepam the mobile phase A contained only water and 0.1% formic acid.

| <b>Antipyrine</b> |                   |           |           |                           |                          |
|-------------------|-------------------|-----------|-----------|---------------------------|--------------------------|
|                   | <b>Time (min)</b> | <b>%A</b> | <b>%B</b> | <b>Flow rate (mL/min)</b> | <b>Internal standard</b> |
|                   | 0.00              | 100.0     | 0.0       |                           |                          |
|                   | 0.50              | 100.0     | 0.0       |                           |                          |
|                   | 3.00              | 37.89     | 62.11     |                           |                          |
|                   | 3.01              | 0.0       | 100.0     | 0.4                       | Antipyrine-d3            |
|                   | 4.00              | 0.0       | 100.0     |                           |                          |
|                   | 4.01              | 100.0     | 0.0       |                           |                          |
|                   | 5.00              | 100.0     | 0.0       |                           |                          |
| <b>Protopine</b>  |                   |           |           |                           |                          |
|                   | <b>Time (min)</b> | <b>%A</b> | <b>%B</b> | <b>Flow rate (mL/min)</b> | <b>Internal standard</b> |
|                   | 0.00              | 100.0     | 0.0       |                           |                          |
|                   | 1.00              | 100.0     | 0.0       |                           |                          |
|                   | 3.00              | 0.0       | 100.0     |                           |                          |
|                   | 4.00              | 0.0       | 100.0     | 0.5                       | Verapamil                |
|                   | 4.01              | 100.0     | 0.0       |                           |                          |
|                   | 5.00              | 100.0     | 0.0       |                           |                          |
| <b>Diazepam</b>   |                   |           |           |                           |                          |
|                   | <b>Time (min)</b> | <b>%A</b> | <b>%B</b> | <b>Flow rate (mL/min)</b> | <b>Internal standard</b> |
|                   | 0.00              | 98.0      | 2.0       |                           |                          |
|                   | 0.50              | 98.0      | 2.0       |                           |                          |
|                   | 4.00              | 10.0      | 90.0      |                           |                          |
|                   | 4.50              | 0.0       | 100.0     | 0.4                       | Diazepam-d5              |
|                   | 5.00              | 0.0       | 100.0     |                           |                          |
|                   | 5.01              | 98.0      | 2.0       |                           |                          |
|                   | 6.00              | 98.0      | 2.0       |                           |                          |
| <b>Citalopram</b> |                   |           |           |                           |                          |
|                   | <b>Time (min)</b> | <b>%A</b> | <b>%B</b> | <b>Flow rate (mL/min)</b> | <b>Internal standard</b> |
|                   | 0.00              | 100.0     | 0.0       |                           |                          |
|                   | 1.00              | 100.0     | 0.0       |                           |                          |
|                   | 3.00              | 0.0       | 100.0     |                           |                          |
|                   | 4.00              | 0.0       | 100.0     | 0.4                       | Citalopram-d4            |
|                   | 4.10              | 100.0     | 0.0       |                           |                          |
|                   | 5.00              | 100.0     | 0.0       |                           |                          |

**Table 5S.** MRM transitions and internal standards for the analysis of antipyrine, protopine, verapamil, diazepam, and citalopram. Gradients as in Table 4S.

| Compound   | Range (ng/mL) | MRM transitions                  | Internal standard | Ionization       |
|------------|---------------|----------------------------------|-------------------|------------------|
| Antipyrine | 5 - 500       | 189.1 > 104.0<br>189.1 > 56.1    | Antipyrine-d3     | ESI <sup>+</sup> |
| Protopine  | 5 - 250       | 354.14 > 189.1<br>354.14 > 149.0 | Verapamil*        | ESI <sup>+</sup> |
| Diazepam   | 10 - 1000     | 285.08 > 193.1<br>285.08 > 154.0 | Diazepam-d5       | ESI <sup>+</sup> |
| Citalopram | 10 - 1000     | 324.9 > 109.1<br>324.9 > 262.1   | Citalopram-d4     | ESI <sup>+</sup> |

\* MRM transition 455.29 > 77.1

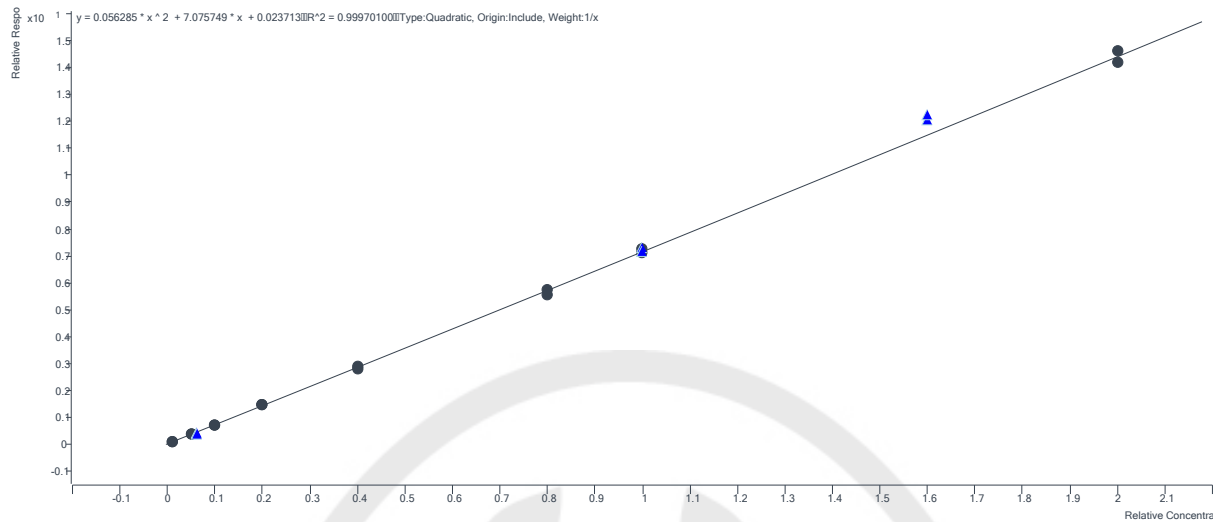

Fig. 5S. Calibration curve of antipyrine (calibrators are shown as dots and quality controls [QCs] are shown as triangles).

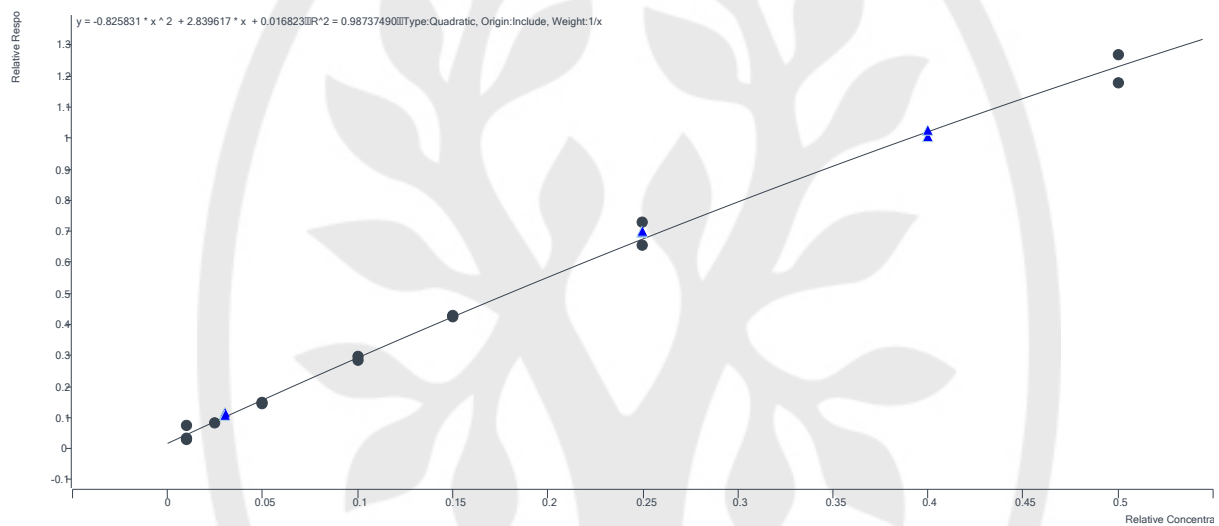

Fig. 6S. Calibration curve of protopine (calibrators are shown as dots and quality controls [QCs] are shown as triangles).

Coefficient of Determination:  $R^2 = 0.998447$   
 Calibration curve:  $2.47105e-007 \cdot x^2 + 0.00518175 \cdot x + 0.000974941$   
 Response type: Internal Std ( Ref 1 ), Area \* ( IS Conc. / IS Area )  
 Curve type: 2nd Order, Origin: Include, Weighting: 1/x, Axis trans: None

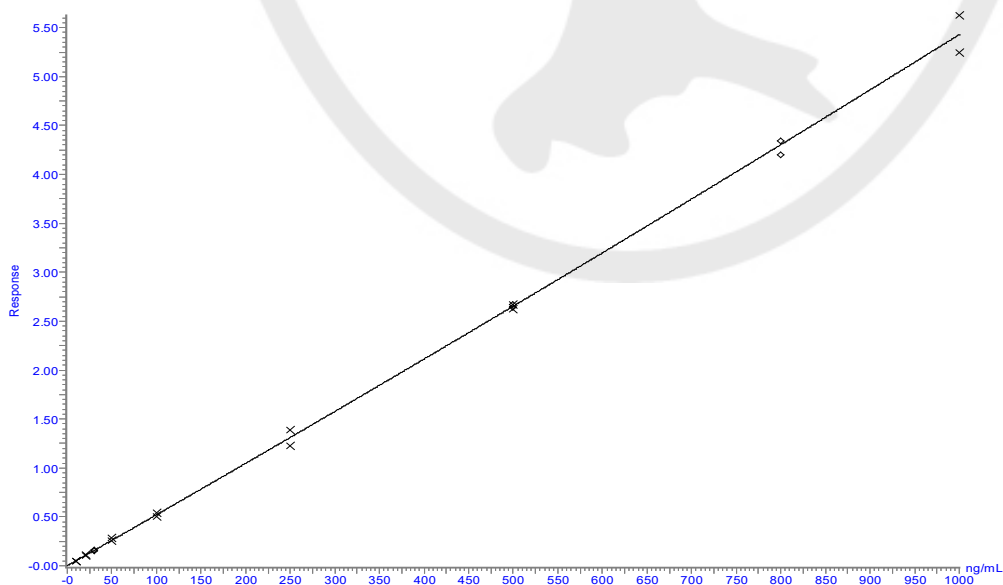

Fig. 7S. Calibration curve of citalopram (calibrators are shown as x and quality controls [QCs] are shown as diamond).

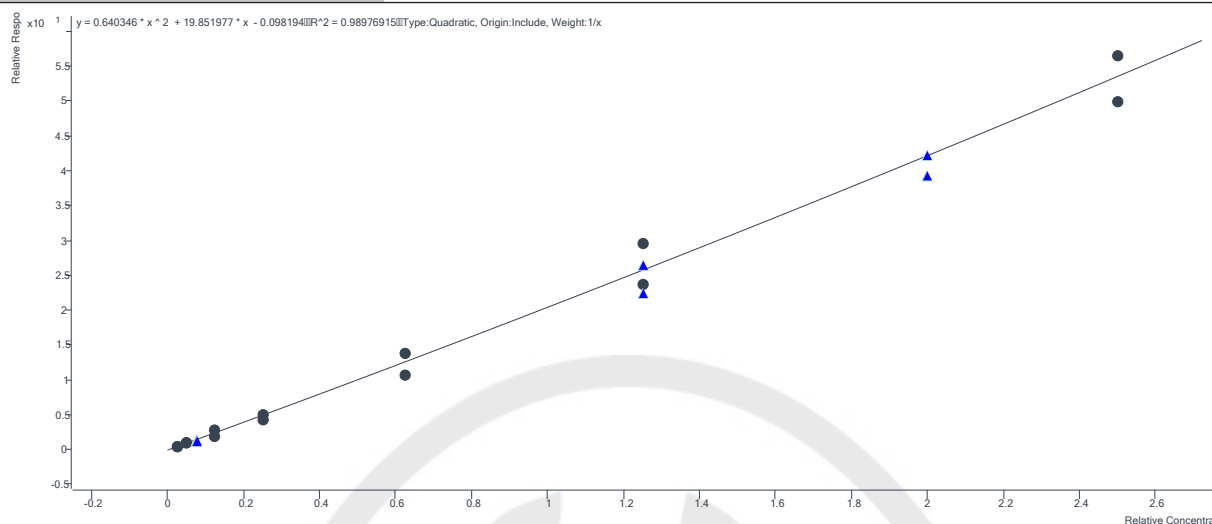

**Fig. 8S.** Calibration curve of diazepam (calibrators are shown as dots and quality controls [QCs] are shown as triangles).

**Table 6S.** Calibrators and calibration curve parameters for the determination of antipyrine.

Response:  $A \times Conc^2 + B \times Conc + C$ , 1/X weighting, Quadratic regression, included origin (n=40).

|      | Concentration (ng/mL) |        |        |        |         |         |         | Regression parameters |       |       |                |
|------|-----------------------|--------|--------|--------|---------|---------|---------|-----------------------|-------|-------|----------------|
|      | 5                     | 25     | 50     | 100    | 200     | 400     | 500     | A                     | B     | C     | R <sup>2</sup> |
| Mean | 5.019                 | 25.361 | 50.383 | 99.622 | 198.024 | 394.796 | 509.635 | -8.02E-02             | 2.270 | 0.008 | 0.998          |
| SD   | 0.398                 | 1.386  | 2.803  | 2.936  | 6.501   | 12.441  | 17.382  | 1.75E-01              |       |       |                |
| CV%  | 7.937                 | 5.467  | 5.563  | 2.947  | 3.283   | 3.151   | 3.151   |                       |       |       |                |
| RE%  | 0.380                 | 1.445  | 0.767  | -0.378 | -0.988  | -1.301  | 1.927   |                       |       |       |                |

**Table 7S.** Calibrators and calibration curve parameters for the determination of protopine.

Response:  $A \times Conc^2 + B \times Conc + C$ , 1/X weighting, Quadratic regression, included origin (n=12).

|      | Concentration (ng/mL) |        |        |        |        |         |         | Regression parameters |       |        |                |
|------|-----------------------|--------|--------|--------|--------|---------|---------|-----------------------|-------|--------|----------------|
|      | 5                     | 12.5   | 25     | 50     | 75     | 125     | 250     | A                     | B     | C      | R <sup>2</sup> |
| Mean | 4.900                 | 12.600 | 24.800 | 51.700 | 76.200 | 120.300 | 253.000 | -1.98E-00             | 3.760 | -0.007 | 0.996          |
| SD   | 0.295                 | 0.765  | 2.058  | 3.856  | 4.854  | 6.182   | 15.707  | 2.39E-00              |       |        |                |
| CV%  | 6.030                 | 6.070  | 8.300  | 7.450  | 6.400  | 5.140   | 6.210   |                       |       |        |                |
| RE%  | -2.280                | 0.785  | -0.980 | 3.400  | 1.579  | -3.740  | 1.194   |                       |       |        |                |

**Table 8S.** Calibrators and calibration curve parameters for the determination of citalopram.

Response:  $A \times Conc^2 + B \times Conc + C$ , 1/X weighting, Quadratic regression, included origin (n=12).

|      | Concentration (ng/mL) |        |        |         |         |         |          | Regression parameters |       |       |                |
|------|-----------------------|--------|--------|---------|---------|---------|----------|-----------------------|-------|-------|----------------|
|      | 10                    | 20     | 50     | 100     | 250     | 500     | 1000     | A                     | B     | C     | R <sup>2</sup> |
| Mean | 10.300                | 19.400 | 51.000 | 102.200 | 253.100 | 490.600 | 1001.500 | -1.43E-06             | 0.020 | 0.043 | 0.997          |
| SD   | 0.815                 | 1.207  | 3.875  | 6.408   | 12.177  | 31.771  | 52.529   | 1.31E-06              |       |       |                |
| CV%  | 7.900                 | 6.220  | 7.600  | 6.270   | 4.800   | 6.480   | 5.250    |                       |       |       |                |
| RE%  | 3.180                 | -2.955 | 1.980  | 2.180   | 1.250   | -1.870  | 0.146    |                       |       |       |                |



**Table 9S.** Calibrators and calibration curve parameters for the determination of diazepam.  
Response:  $A \times Conc^2 + B \times Conc + C$ , 1/X weighting, Quadratic regression, included origin (n=12).

|      | Concentration (ng/mL) |        |        |         |         |         |         | Regression parameters |       |        |                |
|------|-----------------------|--------|--------|---------|---------|---------|---------|-----------------------|-------|--------|----------------|
|      | 10                    | 20     | 50     | 100     | 250     | 500     | 1000    | A                     | B     | C      | R <sup>2</sup> |
| Mean | 10.300                | 19.600 | 49.000 | 101.700 | 251.600 | 498.500 | 986.200 | 3.83E-02              | 0.761 | -0.021 | 0.994          |
| SD   | 0.910                 | 1.386  | 4.380  | 6.962   | 20.408  | 41.574  | 58.331  | 9.39E-02              |       |        |                |
| CV%  | 8.800                 | 7.050  | 8.900  | 6.840   | 8.100   | 8.340   | 5.910   |                       |       |        |                |
| RE%  | 3.330                 | -1.794 | -1.940 | 1.730   | 0.639   | -0.290  | -1.380  |                       |       |        |                |

**Table 10S.** Quality control samples of antipyrine (n=40).

|      | QCL<br>15 | QCM<br>250 | QCH<br>400 |
|------|-----------|------------|------------|
| Mean | 16.100    | 239.400    | 380.500    |
| SD   | 1.680     | 50.420     | 76.350     |
| CV%  | 10.400    | 21.070     | 20.070     |
| RE%  | 7.600     | -4.250     | -4.865     |

**Table 11S.** Quality control samples of protopine (n=12).

|      | QCL<br>15 | QCM<br>125 | QCH<br>200 |
|------|-----------|------------|------------|
| Mean | 16.900    | 125.900    | 202.800    |
| SD   | 0.260     | 12.360     | 23.420     |
| CV%  | 1.500     | 9.820      | 11.550     |
| RE%  | 12.990    | 0.690      | 1.385      |

**Table 12S.** Quality control samples of citalopram (n=12).

|      | QCL<br>30 | QCM<br>500 | QCH<br>800 |
|------|-----------|------------|------------|
| Mean | 33.025    | 520.560    | 835.480    |
| SD   | 0.860     | 16.730     | 50.480     |
| CV%  | 2.700     | 3.240      | 6.030      |
| RE%  | 8.670     | 3.360      | 4.663      |

**Table 13S.** Quality control samples of diazepam (n=12).

|      | QCL<br>30 | QCM<br>500 | QCH<br>800 |
|------|-----------|------------|------------|
| Mean | 30.600    | 504.400    | 801.200    |
| SD   | 2.760     | 27.350     | 36.840     |
| CV%  | 9.000     | 5.420      | 4.600      |
| RE%  | 1.900     | 0.890      | 0.147      |

Table 14S. Carry-over assessment for antipyrine.

| Run                                                            | Replicate | Peak area response (cts) |                   |          |           | Individual carry-over (%) |      | Mean carry-over (%)    |      |      |
|----------------------------------------------------------------|-----------|--------------------------|-------------------|----------|-----------|---------------------------|------|------------------------|------|------|
|                                                                |           | Blank sample             |                   | LLOQ     |           | Analyte                   | IS   | Analyte                | IS   |      |
|                                                                |           | Analyte                  | IS                | Analyte  | IS        |                           |      |                        |      |      |
| 1                                                              | 1         | 0.00                     | 0.00              | 15483.14 | 222133.29 | 0.00                      | 0.00 | 4.00                   | 0.04 |      |
|                                                                | 2         | 1054.29                  | 141.84            | 13171.49 | 183540.99 | 8.00                      | 0.08 |                        |      |      |
| 2                                                              | 1         | 900.18                   | 0.00              | 11057.83 | 158834.00 | 8.14                      | 0.00 | 7.69                   | 0.04 |      |
|                                                                | 2         | 824.46                   | 121.97            | 11378.04 | 160274.60 | 7.25                      | 0.08 |                        |      |      |
| 3                                                              | 1         | 776.10                   | 126.21            | 6320.00  | 137976.60 | 12.28                     | 0.09 | 8.86                   | 0.17 |      |
|                                                                | 2         | 387.52                   | 366.51            | 7125.06  | 152498.84 | 5.44                      | 0.24 |                        |      |      |
| 4                                                              | 1         | 108.88                   | 292.98            | 8766.76  | 171126.49 | 1.24                      | 0.17 | 1.58                   | 0.18 |      |
|                                                                | 2         | 169.18                   | 345.30            | 8826.13  | 180080.12 | 1.92                      | 0.19 |                        |      |      |
| 5                                                              | 1         | 0.00                     | 0.00              | 10196.77 | 199575.63 | 0.00                      | 0.00 | 2.21                   | 0.00 |      |
|                                                                | 2         | 389.88                   | 0.00              | 8809.64  | 216615.27 | 4.43                      | 0.00 |                        |      |      |
| 6                                                              | 1         | 2631.78                  | 336.44            | 17131.43 | 143976.90 | 15.36                     | 0.23 | 16.24                  | 0.53 |      |
|                                                                | 2         | 3260.05                  | 1623.08           | 19055.93 | 195630.14 | 17.11                     | 0.83 |                        |      |      |
| 7                                                              | 1         | *5588.23108212824        | 355.29            | 12784.71 | 124385.47 | -                         | 0.29 | 6.31                   | 0.16 |      |
|                                                                | 2         | 998.41                   | 50.59             | 15824.74 | 155791.82 | 6.31                      | 0.03 |                        |      |      |
| 8                                                              | 1         | 634.72                   | 1613.31           | 12325.89 | 131973.29 | 5.15                      | 1.22 | 5.20                   | 1.17 |      |
|                                                                | 2         | 712.30                   | 1524.55           | 13553.97 | 136836.17 | 5.26                      | 1.11 |                        |      |      |
| 9                                                              | 1         | 414.42                   | 19.14             | 8142.70  | 75724.15  | 5.09                      | 0.03 | 8.58                   | 0.03 |      |
|                                                                | 2         | 1862.45                  | 61.24             | 15422.24 | 149839.59 | 12.08                     | 0.04 |                        |      |      |
| 10                                                             | 1         | 1071.57                  | 68.63             | 10048.99 | 105887.43 | 10.66                     | 0.06 | 9.79                   | 0.05 |      |
|                                                                | 2         | 1011.62                  | 53.25             | 11353.70 | 120649.40 | 8.91                      | 0.04 |                        |      |      |
| 11                                                             | 1         | 2564.87                  | 71.50             | 16715.36 | 142553.79 | 15.34                     | 0.05 | 15.73                  | 0.05 |      |
|                                                                | 2         | 2916.05                  | 80.08             | 18096.49 | 149729.07 | 16.11                     | 0.05 |                        |      |      |
| 12                                                             | 1         | 1020.98                  | 85.83             | 14592.02 | 140330.04 | 7.00                      | 0.06 | 8.20                   | 0.05 |      |
|                                                                | 2         | 1336.30                  | 63.12             | 14218.52 | 142716.85 | 9.40                      | 0.04 |                        |      |      |
| 13                                                             | 1         | 837.07                   | 66.31             | 12497.91 | 131122.86 | 6.70                      | 0.05 | 8.49                   | 0.05 |      |
|                                                                | 2         | 2948.15                  | 65.65             | 28692.43 | 167114.61 | 10.28                     | 0.04 |                        |      |      |
| 14                                                             | 1         | 1232.57                  | 284.99            | 16362.89 | 149697.19 | 7.53                      | 0.19 | 7.53                   | 0.19 |      |
|                                                                | 2         | *10334.6123602373        | *89.7065169210691 | 18322.91 | 166673.99 | -                         | -    |                        |      |      |
| 15                                                             | 1         | 2132.27                  | 99.25             | 12386.00 | 112776.64 | 17.22                     | 0.09 | 14.56                  | 0.08 |      |
|                                                                | 2         | 1528.94                  | 87.59             | 12836.22 | 108165.64 | 11.91                     | 0.08 |                        |      |      |
| 16                                                             | 1         | 0.00                     | 0.00              | 17787.36 | 172245.67 | 0.00                      | 0.00 | 4.84                   | 0.00 |      |
|                                                                | 2         | 877.25                   | 0.00              | 9056.74  | 90599.25  | 9.69                      | 0.00 |                        |      |      |
| 17                                                             | 1         | 177.39                   | 114.45            | 1912.78  | 39997.00  | 9.27                      | 0.29 | 8.00                   | 0.19 |      |
|                                                                | 2         | 165.10                   | 46.87             | 2458.12  | 52289.93  | 6.72                      | 0.09 |                        |      |      |
| 18                                                             | 1         | 113.69                   | 41.44             | 1859.26  | 39040.54  | 6.11                      | 0.11 | 7.46                   | 0.12 |      |
|                                                                | 2         | 177.74                   | 58.88             | 2020.34  | 42213.96  | 8.80                      | 0.14 |                        |      |      |
| 19                                                             | 1         | 415.72                   | 151.04            | 2147.98  | 52787.39  | 19.35                     | 0.29 | 16.71                  | 0.23 |      |
|                                                                | 2         | 423.71                   | 146.43            | 3012.98  | 84257.39  | 14.06                     | 0.17 |                        |      |      |
| 20                                                             | 1         | 334.18                   | 12.76             | 3290.16  | 84747.64  | 10.16                     | 0.02 | 9.90                   | 0.02 |      |
|                                                                | 2         | 298.87                   | 25.83             | 3097.33  | 86228.19  | 9.65                      | 0.03 |                        |      |      |
| *Cal 1 outside acceptance criteria, carry-over not calculated. |           |                          |                   |          |           |                           |      | <b>Mean carry-over</b> | 8.19 | 0.16 |

**Table 15S.** Carry-over assessment for protopine.

| Run | Replicate | Peak area response (cts) |        |          |           | Individual carry-over (%) |                        | Mean carry-over (%) |       |
|-----|-----------|--------------------------|--------|----------|-----------|---------------------------|------------------------|---------------------|-------|
|     |           | Blank sample             |        | LLOQ     |           | Analyte                   | IS                     | Analyte             | IS    |
|     |           | Analyte                  | IS     | Analyte  | IS        |                           |                        |                     |       |
| 1   | 1         | 359.33                   | 209.10 | 8285.35  | 97552.87  | 4.34                      | 0.21                   | 4.20                | 0.31  |
|     | 2         | 326.79                   | 461.11 | 8031.53  | 111516.56 | 4.07                      | 0.41                   |                     |       |
| 2   | 1         | 1213.96                  | 117.56 | 4957.28  | 73555.43  | 24.49                     | 0.16                   | 22.73               | 0.15  |
|     | 2         | 1138.38                  | 110.52 | 5426.01  | 79165.82  | 20.98                     | 0.14                   |                     |       |
| 3   | 1         | 91.71                    | 201.65 | 8069.87  | 123427.64 | 1.14                      | 0.16                   | 1.13                | 0.14  |
|     | 2         | 83.68                    | 138.95 | 7451.73  | 129270.72 | 1.12                      | 0.11                   |                     |       |
| 4   | 1         | 200.34                   | 133.66 | 9992.82  | 168839.27 | 2.00                      | 0.08                   | 3.15                | 0.10  |
|     | 2         | 583.21                   | 268.32 | 13547.80 | 210399.04 | 4.30                      | 0.13                   |                     |       |
| 5   | 1         | 254.09                   | 705.94 | 9336.76  | 165637.38 | 2.72                      | 0.43                   | 1.90                | 0.28  |
|     | 2         | 133.64                   | 261.65 | 12376.77 | 185863.41 | 1.08                      | 0.14                   |                     |       |
| 6   | 1         | 150.42                   | 81.08  | 9258.74  | 173662.54 | 1.62                      | 0.05                   | 2.39                | 0.07  |
|     | 2         | 316.08                   | 178.34 | 10013.84 | 200257.87 | 3.16                      | 0.09                   |                     |       |
|     |           |                          |        |          |           |                           | <b>Mean carry-over</b> | 5.919               | 0.176 |

**Table 16S.** Carry-over assessment for citalopram.

| Run | Replicate | Peak area response (cts) |        |           |          | Individual carry-over (%) |                        | Mean carry-over (%) |       |
|-----|-----------|--------------------------|--------|-----------|----------|---------------------------|------------------------|---------------------|-------|
|     |           | Blank sample             |        | LLOQ      |          | Analyte                   | IS                     | Analyte             | IS    |
|     |           | Analyte                  | IS     | Analyte   | IS       |                           |                        |                     |       |
| 1   | 1         | 12143.52                 | 130.52 | 334833.44 | 23864.26 | 3.63                      | 0.55                   | 2.72                | 0.31  |
|     | 2         | 8979.30                  | 13.29  | 495520.31 | 20404.75 | 1.81                      | 0.07                   |                     |       |
| 2   | 1         | 261.93                   | 13.56  | 6005.38   | 22682.23 | 4.36                      | 0.06                   | 3.80                | 0.06  |
|     | 2         | 194.69                   | 13.45  | 6002.61   | 22931.61 | 3.24                      | 0.06                   |                     |       |
| 3   | 1         | 280.06                   | 6.42   | 7185.11   | 19199.77 | 3.90                      | 0.03                   | 3.63                | 0.02  |
|     | 2         | 273.09                   | 1.74   | 8126.70   | 26066.70 | 3.36                      | 0.01                   |                     |       |
| 4   | 1         | 247.25                   | 6.52   | 7132.82   | 20700.86 | 3.47                      | 0.03                   | 3.42                | 0.05  |
|     | 2         | 248.09                   | 14.25  | 7371.08   | 24053.68 | 3.37                      | 0.06                   |                     |       |
| 5   | 1         | 1358.55                  | 230.73 | 3639.41   | 59973.48 | 37.33                     | 0.38                   | 32.77               | 0.35  |
|     | 2         | 1156.00                  | 191.78 | 4097.65   | 61940.79 | 28.21                     | 0.31                   |                     |       |
| 6   | 1         | 1028.20                  | 174.39 | 3601.83   | 59565.51 | 28.55                     | 0.29                   | 26.42               | 0.28  |
|     | 2         | 898.50                   | 162.33 | 3698.60   | 60280.36 | 24.29                     | 0.27                   |                     |       |
|     |           |                          |        |           |          |                           | <b>Mean carry-over</b> | 12.126              | 0.176 |

**Table 17S.** Carry-over assessment for diazepam.

| Run | Replicate | Peak area response (cts) |        |          |           | Individual carry-over (%) |                        | Mean carry-over (%) |       |
|-----|-----------|--------------------------|--------|----------|-----------|---------------------------|------------------------|---------------------|-------|
|     |           | Blank sample             |        | LLOQ     |           | Analyte                   | IS                     | Analyte             | IS    |
|     |           | Analyte                  | IS     | Analyte  | IS        |                           |                        |                     |       |
| 1   | 1         | 699.34                   | 27.05  | 21728.50 | 68480.63  | 3.22                      | 0.04                   | 2.93                | 0.08  |
|     | 2         | 644.56                   | 77.08  | 24476.12 | 67962.90  | 2.63                      | 0.11                   |                     |       |
| 2   | 1         | 1642.00                  | 72.00  | 42957.00 | 168257.00 | 3.82                      | 0.04                   | 4.32                | 0.05  |
|     | 2         | 1173.00                  | 56.00  | 24311.00 | 95654.00  | 4.82                      | 0.06                   |                     |       |
| 3   | 1         | 894.09                   | 34.42  | 25148.81 | 104117.53 | 3.56                      | 0.03                   | 9.10                | 0.06  |
|     | 2         | 2419.19                  | 46.12  | 16526.26 | 52667.72  | 14.64                     | 0.09                   |                     |       |
| 4   | 1         | 778.72                   | 64.97  | 20966.67 | 209367.04 | 3.71                      | 0.03                   | 2.89                | 0.07  |
|     | 2         | 356.70                   | 167.37 | 17301.90 | 141594.28 | 2.06                      | 0.12                   |                     |       |
| 5   | 1         | 438.00                   | 20.00  | 29823.00 | 103765.00 | 1.47                      | 0.02                   | 1.36                | 0.02  |
|     | 2         | 335.00                   | 9.00   | 26665.00 | 79608.00  | 1.26                      | 0.01                   |                     |       |
| 6   | 1         | 137.00                   | 5.00   | 25805.00 | 68408.00  | 0.53                      | 0.01                   | 0.93                | 0.01  |
|     | 2         | 671.00                   | 18.00  | 50813.00 | 109412.00 | 1.32                      | 0.02                   |                     |       |
|     |           |                          |        |          |           |                           | <b>Mean carry-over</b> | 3.587               | 0.048 |
